# Supplementary material
Source: Royal Society of Chemistry journal article supplement (doi:10.1039/d6cp01035k)
Supplement: d6cp01035k1.pdf [file d6cp01035k1.pdf]

## Supplementary Information

### First-principles investigation of pressure-induced variation in the structural and physical properties of ternary high- $T_c$ superconductor $\text{LaBeH}_8$

Siheng Li<sup>1</sup>, Yuanyuan Jin<sup>1</sup>, Xiangzhen Guan<sup>1</sup>, Yuan Zhu<sup>1</sup>, Yin Huang<sup>1</sup>, Chuanzhao Zhang<sup>1,\*</sup>, Fangguang Kuang<sup>2</sup> and Meng Ju<sup>3,\*</sup>

<sup>1</sup> Department of Physics and Optoelectronic Engineering, Yangtze University, Jingzhou 434023, China.

<sup>2</sup> School of Physics and Electronic Information, Gannan Normal University, Ganzhou 341000, China.

<sup>3</sup> School of Physical Science and Technology, Southwest University, Chongqing 400715, China.

Email address: [scujyy@163.com](mailto:scujyy@163.com) (Yuanyuan Jin) and [mengju@swu.edu.cn](mailto:mengju@swu.edu.cn) (Meng Ju).

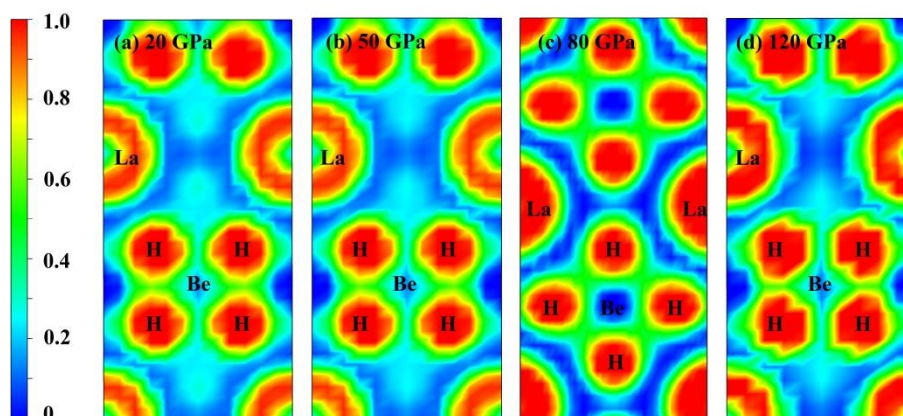

**Fig. S1** The 2D electron localization function (ELF) in the (1 1 0) plane for the  $Fm\bar{3}m$ - $\text{LaBeH}_8$  phase at 20, 50, 80 and 120 GPa.

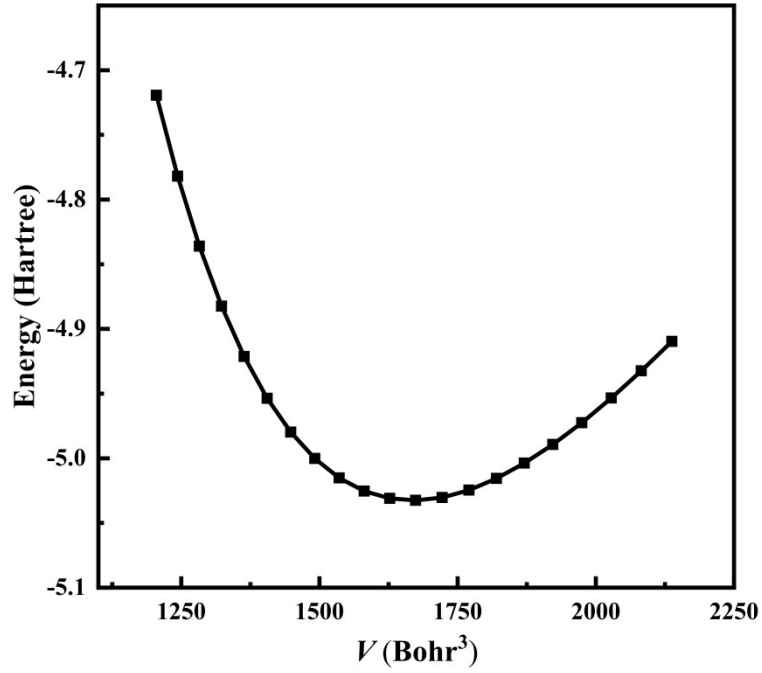

**Fig. S2** The calculated total energies of  $Fm\bar{3}m$ -LaBeH<sub>8</sub> as function of volume.

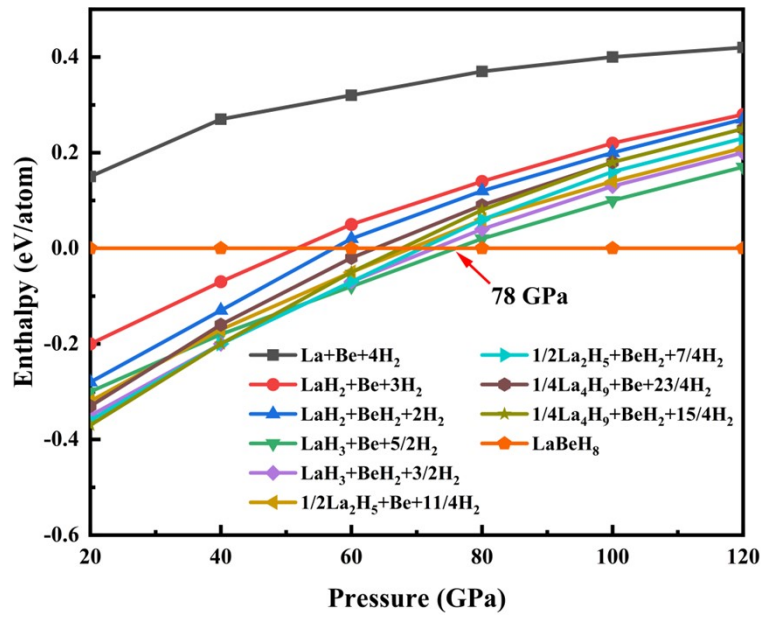

**Fig. S3** Static ground-state enthalpy curves as a function of pressure with respect to  $Fm\bar{3}m$ -LaBeH<sub>8</sub>.

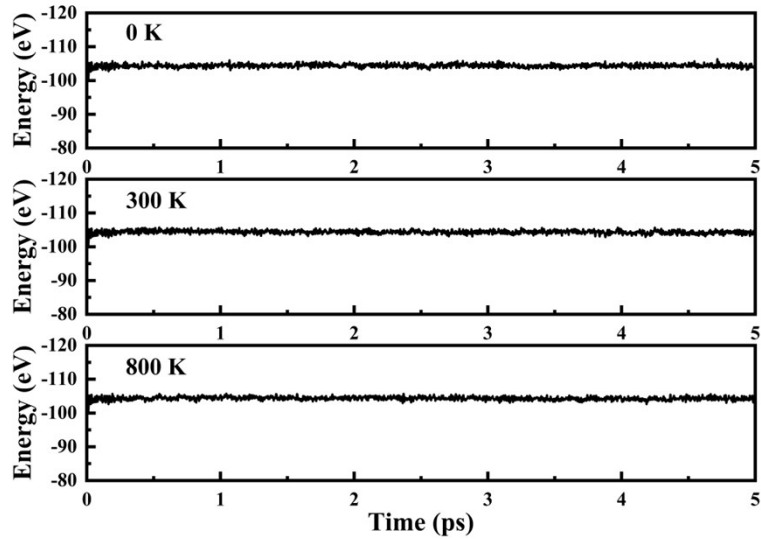

**Fig. S4** Free energy as a function of MD time at the temperatures of 0, 300 and 800 K for  $Fm\bar{3}m$ -LaBeH<sub>8</sub> at 20 GPa.

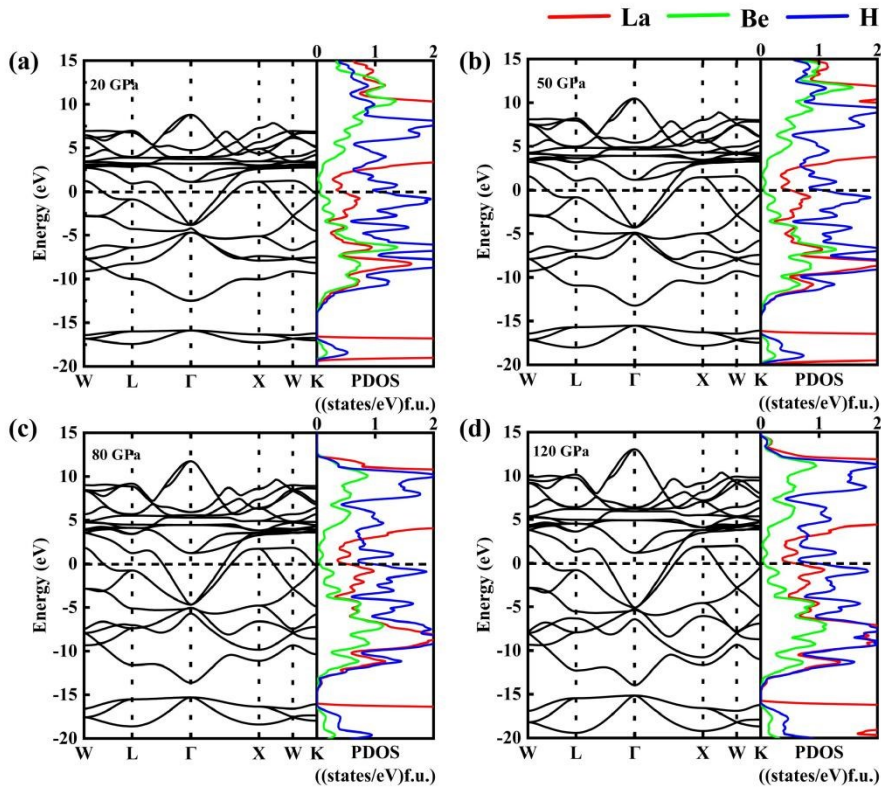

**Fig. S5** The predicted electronic energy band structure and projected density of states (PDOS) of  $Fm\bar{3}m$ -LaBeH<sub>8</sub> through the HSE06 functional under the pressures of 20, 50, 80 and 120 GPa.

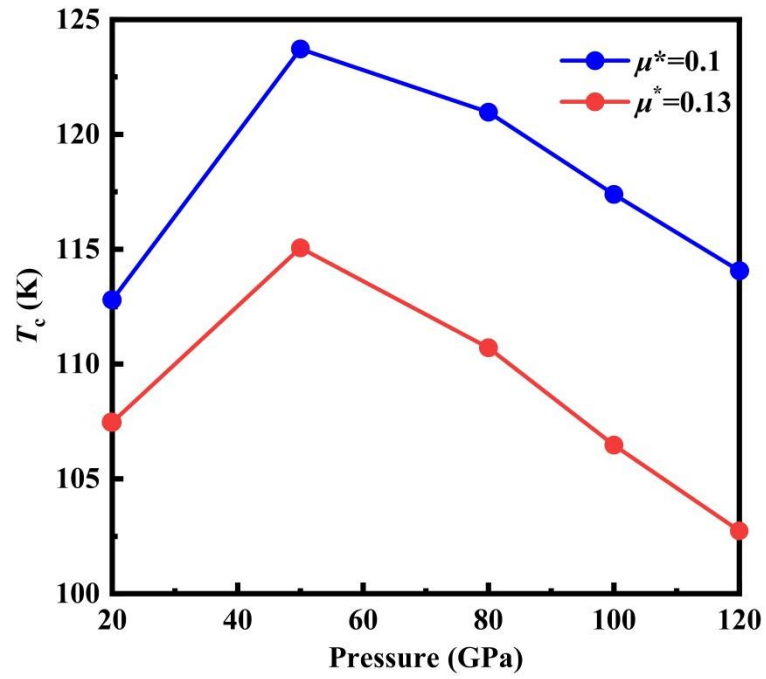

**Fig. S6** The  $T_c$  values of  $Fm\bar{3}m$ -LaBeH<sub>8</sub> as a function of pressure with the  $\mu^*$  values of 0.1 and 0.13.

**Table S1** The computed Bader charges of La, Be and H atoms in the  $Fm\bar{3}m$ -LaBeH<sub>8</sub> configuration at 20, 50, 80 and 120 GPa.  $\delta$  represents the quantitative charge transferred from the La or Be atom to the H atom.

| Pressure (GPa) | Atom | Charge value ( $e$ ) | $\delta$ ( $e$ ) |
|----------------|------|----------------------|------------------|
| 20             | La   | 9.46                 | 1.54             |
|                | Be   | 0.49                 | 1.51             |
|                | H1   | 1.34                 | -0.34            |
|                | H2   | 1.42                 | -0.42            |
| 50             | La   | 9.61                 | 1.39             |
|                | Be   | 0.47                 | 1.53             |
|                | H1   | 1.32                 | -0.32            |
|                | H2   | 1.40                 | -0.40            |
| 80             | La   | 9.62                 | 1.38             |
|                | Be   | 0.52                 | 1.48             |
|                | H1   | 1.35                 | -0.35            |
|                | H2   | 1.39                 | -0.39            |
| 120            | La   | 9.75                 | 1.25             |
|                | Be   | 0.48                 | 1.52             |
|                | H1   | 1.33                 | -0.33            |
|                | H2   | 1.39                 | -0.39            |

**Table S2** The lattice parameters,  $a$ ,  $b$  and  $c$  ( $\text{\AA}$ ), cell volume  $V$  ( $\text{\AA}^3$ ), atomic cohesive energy  $E_{\text{coh}}$  (eV/atom) and formation enthalpy  $\Delta H$  (eV/atom) for  $Fm\bar{3}m$ -LaBeH<sub>8</sub> under different pressures.

| Pressure (GPa) | Lattice parameters ( $\text{\AA}$ )<br>$a = b = c$ | $V$ ( $\text{\AA}^3$ ) | $E_{\text{coh}}$ (eV/atom) | $\Delta H$ (eV/atom) |
|----------------|----------------------------------------------------|------------------------|----------------------------|----------------------|
| 20             | 5.93                                               | 208.27                 | 3.301                      | 7.767                |
| 30             | 5.82                                               | 196.78                 | 3.256                      | 5.940                |
| 40             | 5.72                                               | 187.50                 | 3.274                      | 4.659                |
| 50             | 5.64                                               | 179.69                 | 3.219                      | 3.510                |
| 60             | 5.57                                               | 173.17                 | 3.163                      | 2.291                |
| 70             | 5.51                                               | 167.47                 | 3.106                      | 1.172                |
| 80             | 5.46                                               | 162.45                 | 3.047                      | 0.083                |
| 90             | 5.41                                               | 157.99                 | 2.988                      | -0.991               |
| 100            | 5.36                                               | 153.89                 | 2.927                      | -2.067               |
| 110            | 5.32                                               | 150.27                 | 2.868                      | -3.074               |
| 120            | 5.28                                               | 147.01                 | 2.809                      | -4.080               |

**Table S3** The lattice parameters,  $a$ ,  $b$  and  $c$  (Å), cell volume  $V$  (Å<sup>3</sup>) through the third-order Birch-Murnaghan equation for  $Fm\bar{3}m$ -LaBeH<sub>8</sub> under different pressures.

| Pressure (GPa) | Lattice parameters (Å)<br>$a = b = c$ | $V$ (Å <sup>3</sup> ) |
|----------------|---------------------------------------|-----------------------|
| 20             | 5.93                                  | 208.18                |
| 30             | 5.81                                  | 196.53                |
| 40             | 5.72                                  | 187.28                |
| 50             | 5.64                                  | 179.41                |
| 60             | 5.57                                  | 173.00                |
| 70             | 5.51                                  | 167.32                |
| 80             | 5.46                                  | 162.20                |
| 90             | 5.41                                  | 157.69                |
| 100            | 5.36                                  | 153.60                |
| 110            | 5.32                                  | 150.04                |
| 120            | 5.28                                  | 146.80                |

**Table S4** The calculated elastic constants  $C_{ij}$  (GPa), Cauchy pressure CP (GPa) ( $C'$ ) and tetragonal shear modulus TSM (GPa) ( $C''$ ) of  $Fm\bar{3}m$ -LaBeH<sub>8</sub> under various pressures.

| Pressure (GPa) | $C_{ij}$ (GPa) |          |          | CP (GPa) | TSM (GPa) |
|----------------|----------------|----------|----------|----------|-----------|
|                | $C_{11}$       | $C_{12}$ | $C_{44}$ | $C'$     | $C''$     |
| 20             | 308.22         | 53.48    | 36.13    | 17.3     | 127.37    |
| 30             | 355.22         | 61.03    | 27.35    | 33.7     | 147.10    |
| 40             | 403.23         | 72.89    | 20.61    | 52.3     | 165.17    |
| 50             | 443.04         | 84.14    | 17.28    | 66.9     | 179.45    |
| 60             | 479.28         | 96.76    | 15.55    | 81.2     | 191.26    |
| 70             | 512.94         | 110.86   | 20.72    | 90.1     | 201.04    |
| 80             | 544.05         | 126.21   | 31.55    | 94.7     | 208.92    |
| 90             | 566.02         | 141.24   | 29.77    | 111.5    | 212.39    |
| 100            | 597.57         | 156.33   | 40.21    | 116.1    | 220.62    |
| 110            | 623.16         | 177.76   | 49.79    | 128.0    | 222.70    |
| 120            | 642.10         | 188.30   | 47.43    | 120.9    | 226.90    |

**Table S5** The polycrystalline elastic parameters of  $Fm\bar{3}m$ -LaBeH<sub>8</sub> under discrete pressures.

| Pressure<br>(GPa) | Polycrystalline elastic moduli (GPa)           |                |                |                |                |                |                |
|-------------------|------------------------------------------------|----------------|----------------|----------------|----------------|----------------|----------------|
|                   | B                                              | G              |                |                | E              |                |                |
|                   | B <sub>V</sub> =B <sub>R</sub> =B <sub>H</sub> | G <sub>V</sub> | G <sub>R</sub> | G <sub>H</sub> | E <sub>V</sub> | E <sub>R</sub> | E <sub>H</sub> |
| 20                | 138.39                                         | 72.63          | 50.65          | 61.64          | 185.45         | 135.43         | 161.01         |
| 30                | 159.09                                         | 75.25          | 40.57          | 57.91          | 195.00         | 112.17         | 154.93         |
| 40                | 183.00                                         | 78.43          | 31.72          | 55.08          | 205.88         | 89.96          | 150.16         |
| 50                | 203.77                                         | 82.15          | 27.07          | 54.61          | 217.25         | 77.77          | 150.40         |
| 60                | 224.27                                         | 85.83          | 24.59          | 55.21          | 228.36         | 71.17          | 153.07         |
| 70                | 244.89                                         | 92.85          | 32.32          | 62.59          | 247.30         | 92.87          | 173.02         |
| 80                | 265.49                                         | 102.50         | 47.77          | 75.14          | 272.44         | 135.20         | 205.97         |
| 90                | 282.83                                         | 102.82         | 45.38          | 74.10          | 275.12         | 129.23         | 204.45         |
| 100               | 303.41                                         | 112.37         | 59.74          | 86.06          | 300.07         | 168.18         | 235.87         |
| 110               | 326.23                                         | 118.95         | 72.21          | 95.58          | 318.18         | 201.74         | 261.23         |
| 120               | 339.57                                         | 119.22         | 69.37          | 94.30          | 320.19         | 194.84         | 258.92         |

**Table S6** The calculated Poisson's ratio ( $\nu$ ), Pugh's ratio ( $G/B$ ) and machinability index ( $\mu_m$ ) for  $Fm\bar{3}m$ -LaBeH<sub>8</sub> under various pressures.

| Pressure (GPa) | $\nu$ | $G/B$ | $\mu_m$ |
|----------------|-------|-------|---------|
| 20             | 0.31  | 0.45  | 3.83    |
| 30             | 0.34  | 0.36  | 5.82    |
| 40             | 0.36  | 0.30  | 8.88    |
| 50             | 0.38  | 0.27  | 11.79   |
| 60             | 0.39  | 0.25  | 14.42   |
| 70             | 0.38  | 0.26  | 11.82   |
| 80             | 0.37  | 0.28  | 8.42    |
| 90             | 0.38  | 0.26  | 9.50    |
| 100            | 0.37  | 0.28  | 7.55    |
| 110            | 0.37  | 0.29  | 6.55    |
| 120            | 0.37  | 0.28  | 7.16    |

**Table S7** The simulated shear anisotropy factors  $A_1$ ,  $A_2$ ,  $A_3$  and  $A^B$  (in %),  $A^G$  (in %),  $A^U$  of  $Fm\bar{3}m$ -LaBeH<sub>8</sub> under discrete pressures.

| Pressure (GPa) | $A_1$ | $A_2$ | $A_3$ | $A^B$ | $A^G$ | $A^U$  |
|----------------|-------|-------|-------|-------|-------|--------|
| 20             | 0.558 | 0.480 | 0.194 | 0     | 0.178 | 2.170  |
| 30             | 0.686 | 0.625 | 0.381 | 0     | 0.299 | 4.274  |
| 40             | 0.778 | 0.734 | 0.559 | 0     | 0.424 | 7.363  |
| 50             | 0.824 | 0.790 | 0.659 | 0     | 0.504 | 10.174 |
| 60             | 0.850 | 0.823 | 0.723 | 0     | 0.555 | 12.452 |
| 70             | 0.813 | 0.784 | 0.685 | 0     | 0.484 | 9.364  |
| 80             | 0.738 | 0.704 | 0.600 | 0     | 0.364 | 5.728  |
| 90             | 0.754 | 0.727 | 0.652 | 0     | 0.388 | 6.329  |
| 100            | 0.692 | 0.664 | 0.591 | 0     | 0.306 | 4.405  |
| 110            | 0.635 | 0.613 | 0.562 | 0     | 0.245 | 3.236  |
| 120            | 0.654 | 0.637 | 0.598 | 0     | 0.264 | 3.593  |

**Table S8** The calculated transverse sound velocity ( $v_t$ ), longitudinal sound velocity ( $v_l$ ), average sound velocity ( $v_m$ ), Vickers hardness ( $H_v$ ) and density ( $\rho$ ) of  $Fm\bar{3}m$ -LaBeH<sub>8</sub> under different pressures.

| Pressure (GPa) | Sound velocities (m/s) |         |         | Hardness (GPa) | $\rho$ (gm/cm <sup>3</sup> ) |
|----------------|------------------------|---------|---------|----------------|------------------------------|
|                | $v_t$                  | $v_l$   | $v_m$   |                |                              |
| 20             | 3519.90                | 6658.79 | 3934.71 | 5.61           | 4.98                         |
| 30             | 3316.20                | 6699.15 | 3722.32 | 3.56           | 5.27                         |
| 40             | 3157.05                | 6812.30 | 3555.88 | 2.10           | 5.53                         |
| 50             | 3077.47                | 6925.97 | 3472.77 | 1.43           | 5.77                         |
| 60             | 3037.85                | 7056.16 | 3432.41 | 1.05           | 5.98                         |
| 70             | 3180.45                | 7284.80 | 3591.57 | 1.54           | 6.19                         |
| 80             | 3432.25                | 7571.95 | 3869.79 | 2.69           | 6.38                         |
| 90             | 3361.37                | 7628.55 | 3794.46 | 2.16           | 6.56                         |
| 100            | 3575.47                | 7881.12 | 4031.11 | 3.18           | 6.73                         |
| 110            | 3723.44                | 8111.72 | 4195.70 | 3.82           | 6.89                         |
| 120            | 3657.84                | 8125.30 | 4125.39 | 3.36           | 7.05                         |

**Table S9** The calculated Grüneisen parameter ( $\gamma$ ), Kleinman parameter ( $\zeta$ ), Debye temperature  $\theta_D$  (K), melting temperature  $T_m$  (K) and thermal expansion coefficient  $\alpha$  ( $10^{-5} \text{ K}^{-1}$ ) of  $Fm\bar{3}m$ -LaBeH<sub>8</sub> under various pressures.

| Pressure (GPa) | $\gamma$ | $\zeta$ | $\theta_D$ (K) | $T_m$ (K) | $\alpha$<br>( $10^{-5} \text{ K}^{-1}$ ) |
|----------------|----------|---------|----------------|-----------|------------------------------------------|
| 20             | 1.81     | 0.33    | 675.9          | 1370.90   | 25.96                                    |
| 30             | 2.04     | 0.32    | 651.6          | 1493.23   | 27.63                                    |
| 40             | 2.24     | 0.33    | 632.6          | 1634.53   | 29.05                                    |
| 50             | 2.38     | 0.34    | 626.6          | 1757.29   | 29.30                                    |
| 60             | 2.47     | 0.35    | 627.0          | 1878.18   | 29.00                                    |
| 70             | 2.43     | 0.37    | 663.4          | 2000.25   | 25.57                                    |
| 80             | 2.32     | 0.38    | 722.1          | 2122.05   | 21.30                                    |
| 90             | 2.41     | 0.40    | 714.7          | 2224.54   | 21.59                                    |
| 100            | 2.31     | 0.41    | 765.9          | 2346.15   | 18.59                                    |
| 110            | 2.28     | 0.43    | 803.5          | 2480.98   | 16.74                                    |
| 120            | 2.34     | 0.44    | 795.9          | 2559.82   | 16.97                                    |

**Table S10** The calculated contribution proportion (%) for the projected density of states for La, Be, and H to the total density of states around the Fermi level in  $Fm\bar{3}m$ -LaBeH<sub>8</sub> under 20, 50, 80, and 120 GPa.

| Pressure (GPa) | La   | Be  | H    |
|----------------|------|-----|------|
| 20             | 32.9 | 3.2 | 63.9 |
| 50             | 36.6 | 3.4 | 60.0 |
| 80             | 36.3 | 3.8 | 59.9 |
| 120            | 40.1 | 3.9 | 56.0 |

**Table S11** The calculated contribution proportion (%) for the projected density of states for La, Be, and H to the total density of states around the Fermi level within the HSE06 functional in  $Fm\bar{3}m$ -LaBeH<sub>8</sub> under 20, 50, 80, and 120 GPa.

| Pressure (GPa) | La   | Be  | H    |
|----------------|------|-----|------|
| 20             | 29.9 | 0.9 | 69.2 |
| 50             | 32.1 | 1.7 | 66.2 |
| 80             | 33.3 | 4.0 | 62.7 |
| 120            | 33.7 | 7.1 | 59.2 |

**Table S12** The simulated contribution ratios (%) of La, Be, and H atomic vibrations to the electron–phonon coupling (EPC) in  $Fm\bar{3}m$ -LaBeH<sub>8</sub> at 20, 50, 80, and 120 GPa.

| Pressure (GPa) | La   | Be   | H    |
|----------------|------|------|------|
| 20             | 27.6 | 11.6 | 61.3 |
| 50             | 9.5  | 5.4  | 82.7 |
| 80             | 13.4 | 5.3  | 81.9 |
| 120            | 14.9 | 5.4  | 79.3 |
